# Supplementary material for: Preventive Effect of the Total Polyphenols from Nymphaea candida on Sepsis-Induced Acute Lung Injury in Mice via Gut Microbiota and NLRP3, TLR-4/NF-κB Pathway
Source: MDPI journal article supplement (doi:10.3390/ijms25084276), 2024-04-12
Supplement: s1 [file s1]

## Supplementary Materials

This supplementary materials file contains the following contents:

|                       |                  |
|-----------------------|------------------|
| Supplementary Tables  | Table S1 to S11  |
| Supplementary Figures | Figures S1 to S4 |

**Table S1.** Effect of NCTP on lung tissues MPO levels in LPS-induced ALI mice

| Group          | MPO(pg/mL)                 |
|----------------|----------------------------|
| Control        | 320.94±33.19               |
| Model          | 540.52±84.76 <sup>##</sup> |
| NCTP, 50mg/kg  | 537.01±91.14               |
| NCTP, 100mg/kg | 451.15±23.05*              |
| NCTP, 200mg/kg | 400.35±59.82**             |
| DEX, 3 mg/kg   | 346.38±26.35**             |

Data are presented as mean±SD, *n*=6. <sup>##</sup>*p*<0.01 versus control group, \**p*<0.05 and \*\**p*<0.01 versus model group.

**Table S2.** Effect of NCTP on BALF total protein, LDH contents in ALI mice

| Group          | LDH(U/L)                 | BCA(mg/mL)              |
|----------------|--------------------------|-------------------------|
| Control        | 3.93±0.58                | 0.058±0.03              |
| Model          | 17.38±2.12 <sup>##</sup> | 0.229±0.08 <sup>#</sup> |
| NCTP, 50mg/kg  | 6.92±2.06**              | 0.105±0.02              |
| NCTP, 100mg/kg | 6.75±1.46**              | 0.094±0.05              |
| NCTP, 200mg/kg | 5.77±1.59**              | 0.066±0.03*             |
| DEX, 3 mg/kg   | 5.50±1.73**              | 0.065±0.04*             |

Data are presented as mean±SD, *n*=6. <sup>#</sup>*p*<0.05 and <sup>##</sup>*p*<0.01 versus control group, \**p*<0.05 and \*\**p*<0.01 versus model group.

**Table S3.** Effects of inflammatory factors in blood in mice with ALI.

| Group          | WBC(10 <sup>9</sup> /L) | NEU(10 <sup>9</sup> /L) | MON(10 <sup>9</sup> /L) | BAS(10 <sup>9</sup> /L)  | EOS(10 <sup>9</sup> /L) | LYM(10 <sup>9</sup> /L) |
|----------------|-------------------------|-------------------------|-------------------------|--------------------------|-------------------------|-------------------------|
| Control        | 3.38±0.68               | 0.97±0.07               | 0.17±0.02               | 0.023±0.01               | 0.08±0.02               | 2.81±0.70               |
| Model          | 5.47±0.58 <sup>##</sup> | 3.29±0.32 <sup>##</sup> | 0.26±0.03 <sup>##</sup> | 0.052±0.01 <sup>##</sup> | 0.21±0.05 <sup>#</sup>  | 1.12±0.13 <sup>#</sup>  |
| NCTP, 50mg/kg  | 3.80±0.13*              | 2.54±0.17*              | 0.22±0.02**             | 0.027±0.01**             | 0.15±0.03               | 1.28±0.27               |
| NCTP, 100mg/kg | 3.76±0.22**             | 2.16±0.13**             | 0.20±0.03**             | 0.022±0.01**             | 0.11±0.02*              | 1.62±0.93               |
| NCTP, 200mg/kg | 3.38±0.37**             | 2.10±0.25**             | 0.17±0.03**             | 0.018±0.01**             | 0.10±0.02*              | 1.70±0.25*              |
| DEX, 3 mg/kg   | 3.42±0.76**             | 1.84±0.50**             | 0.20±0.03**             | 0.027±0.01*              | 0.10±0.02*              | 1.89±0.87               |

Data are presented as mean±SD, *n*=6. <sup>#</sup>*p*<0.05 and <sup>##</sup>*p*<0.01 versus control group, \**p*<0.05 and \*\**p*<0.01 versus model group.

**Table S4.** Effects of inflammatory factors in blood in mice with ALI

| Group          | TNF- $\alpha$ (pg/mL)            | IL-1 $\beta$ (pg/mL)           | IL-6(pg/mL)                    | LPS(EU/L)                      |
|----------------|----------------------------------|--------------------------------|--------------------------------|--------------------------------|
| Control        | 229.16 $\pm$ 41.40               | 14.19 $\pm$ 2.96               | 27.12 $\pm$ 4.60               | 5.66 $\pm$ 0.74                |
| Model          | 461.10 $\pm$ 41.22 <sup>##</sup> | 42.84 $\pm$ 6.86 <sup>##</sup> | 63.71 $\pm$ 8.46 <sup>##</sup> | 12.68 $\pm$ 2.06 <sup>##</sup> |
| NCTP, 50mg/kg  | 360.21 $\pm$ 37.02 <sup>**</sup> | 32.70 $\pm$ 6.10 <sup>**</sup> | 43.84 $\pm$ 5.20 <sup>**</sup> | 6.51 $\pm$ 0.30 <sup>*</sup>   |
| NCTP, 100mg/kg | 344.13 $\pm$ 50.69 <sup>**</sup> | 27.42 $\pm$ 4.33 <sup>**</sup> | 37.49 $\pm$ 6.10 <sup>**</sup> | 5.76 $\pm$ 0.30 <sup>**</sup>  |
| NCTP, 200mg/kg | 339.03 $\pm$ 76.31 <sup>**</sup> | 22.66 $\pm$ 3.32 <sup>**</sup> | 33.05 $\pm$ 5.22 <sup>**</sup> | 5.53 $\pm$ 0.40 <sup>**</sup>  |
| DEX, 3 mg/kg   | 323.69 $\pm$ 69.11 <sup>**</sup> | 20.62 $\pm$ 4.46 <sup>**</sup> | 24.41 $\pm$ 2.83 <sup>**</sup> | 5.87 $\pm$ 0.56 <sup>**</sup>  |

Data are presented as mean $\pm$ SD.,  $n=6$ . <sup>##</sup> $p<0.01$  versus control group, <sup>\*</sup> $p<0.05$  and <sup>\*\*</sup> $p<0.01$  versus model group.

**Table S5.** Effects of NCTP on proteins expression of TLR-4/NF- $\kappa$ B p65 in the lung tissues of mice

| Group          | TLR 4                         | MyD 88                        | TRAF6                         | IKK                           | p-I $\kappa$ B                | p-NF- $\kappa$ B p65          |
|----------------|-------------------------------|-------------------------------|-------------------------------|-------------------------------|-------------------------------|-------------------------------|
| Control        | 0.35 $\pm$ 0.06               | 0.47 $\pm$ 0.11               | 0.42 $\pm$ 0.11               | 0.49 $\pm$ 0.14               | 0.51 $\pm$ 0.05               | 0.65 $\pm$ 0.13               |
| Model          | 1.07 $\pm$ 0.16 <sup>##</sup> | 1.07 $\pm$ 0.08 <sup>##</sup> | 0.95 $\pm$ 0.11 <sup>##</sup> | 1.12 $\pm$ 0.05 <sup>##</sup> | 1.37 $\pm$ 0.17 <sup>##</sup> | 1.18 $\pm$ 0.06 <sup>##</sup> |
| NCTP, 50mg/kg  | 0.96 $\pm$ 0.13               | 0.83 $\pm$ 0.04 <sup>**</sup> | 0.81 $\pm$ 0.23               | 0.79 $\pm$ 0.19 <sup>**</sup> | 0.87 $\pm$ 0.19 <sup>**</sup> | 1.12 $\pm$ 0.28               |
| NCTP, 100mg/kg | 0.92 $\pm$ 0.16               | 0.73 $\pm$ 0.08 <sup>**</sup> | 0.81 $\pm$ 0.22               | 0.67 $\pm$ 0.16 <sup>**</sup> | 0.78 $\pm$ 0.04 <sup>**</sup> | 0.84 $\pm$ 0.30               |
| NCTP, 200mg/kg | 0.73 $\pm$ 0.25 <sup>*</sup>  | 0.46 $\pm$ 0.09 <sup>**</sup> | 0.45 $\pm$ 0.15 <sup>**</sup> | 0.46 $\pm$ 0.13 <sup>**</sup> | 0.61 $\pm$ 0.28 <sup>**</sup> | 0.63 $\pm$ 0.31 <sup>*</sup>  |
| DEX, 3 mg/kg   | 0.71 $\pm$ 0.25 <sup>*</sup>  | 0.44 $\pm$ 0.18 <sup>**</sup> | 0.40 $\pm$ 0.18 <sup>**</sup> | 0.54 $\pm$ 0.28 <sup>**</sup> | 0.70 $\pm$ 0.10 <sup>**</sup> | 0.75 $\pm$ 0.01 <sup>*</sup>  |

Data are presented as mean $\pm$ SD.,  $n=6$ . <sup>##</sup> $p<0.01$  versus control group, <sup>\*</sup> $p<0.05$  and <sup>\*\*</sup> $p<0.01$  versus model group.

**Table S6.** Effects of NCTP on proteins expression of NLRP3 in lung tissues of mice

| Group          | NLRP3                         | ASC                           | Caspase1                      |
|----------------|-------------------------------|-------------------------------|-------------------------------|
| Control        | 0.34 $\pm$ 0.05               | 0.25 $\pm$ 0.09               | 0.40 $\pm$ 0.26               |
| Model          | 1.03 $\pm$ 0.06 <sup>##</sup> | 0.91 $\pm$ 0.12 <sup>##</sup> | 0.99 $\pm$ 0.24 <sup>##</sup> |
| NCTP, 50mg/kg  | 0.92 $\pm$ 0.16               | 0.70 $\pm$ 0.25               | 0.84 $\pm$ 0.10               |
| NCTP, 100mg/kg | 0.72 $\pm$ 0.03 <sup>**</sup> | 0.60 $\pm$ 0.12 <sup>*</sup>  | 0.87 $\pm$ 0.16               |
| NCTP, 200mg/kg | 0.51 $\pm$ 0.07 <sup>**</sup> | 0.43 $\pm$ 0.21 <sup>**</sup> | 0.57 $\pm$ 0.03 <sup>*</sup>  |
| DEX, 3 mg/kg   | 0.61 $\pm$ 0.15 <sup>**</sup> | 0.28 $\pm$ 0.14 <sup>**</sup> | 0.53 $\pm$ 0.19 <sup>**</sup> |

Data are presented as mean $\pm$ SD.,  $n=6$ . <sup>##</sup> $p<0.01$  versus control group, <sup>\*</sup> $p<0.05$  and <sup>\*\*</sup> $p<0.01$  versus model group.

**Table S7.** Effect of NCTP on the levels of LBP in intestinal tissue

| Group          | LBP(pg/mL)                     |
|----------------|--------------------------------|
| Control        | 3.16 $\pm$ 0.84                |
| Model          | 10.84 $\pm$ 1.10 <sup>##</sup> |
| NCTP, 50mg/kg  | 5.33 $\pm$ 0.29 <sup>**</sup>  |
| NCTP, 100mg/kg | 4.58 $\pm$ 0.27 <sup>**</sup>  |
| NCTP, 200mg/kg | 4.31 $\pm$ 0.43 <sup>**</sup>  |
| DEX, 3 mg/kg   | 3.89 $\pm$ 0.71 <sup>**</sup>  |

Data are presented as mean $\pm$ SD.,  $n=6$ . <sup>##</sup> $p<0.01$  versus control group, <sup>\*\*</sup> $p<0.01$  versus model group.

**Table 8.** Effects of NCTP on ZO-1 and occludin protein expression in ALI induced by LPS.

| Group | ZO-1 | occludin |
|-------|------|----------|
|-------|------|----------|

|                |                         |                         |
|----------------|-------------------------|-------------------------|
| Control        | 0.21±0.01               | 0.21±0.01               |
| Model          | 0.12±0.00 <sup>##</sup> | 0.14±0.00 <sup>##</sup> |
| NCTP, 50mg/kg  | 0.15±0.00 <sup>**</sup> | 0.15±0.00 <sup>**</sup> |
| NCTP, 100mg/kg | 0.17±0.00 <sup>**</sup> | 0.17±0.00 <sup>**</sup> |
| NCTP, 200mg/kg | 0.18±0.00 <sup>**</sup> | 0.19±0.00 <sup>**</sup> |
| DEX, 3 mg/kg   | 0.19±0.00 <sup>**</sup> | 0.19±0.01 <sup>**</sup> |

Data are presented as mean±SD., n=6. <sup>##</sup>p<0.01 versus control group, <sup>\*\*</sup>p<0.01 versus model group.

**Table S9.** Effects of NCTP on the gut microbiota dysbiosis of alpha diversity index

| Group           | Chao1   | Simpson  | Shannon | Observed_species |
|-----------------|---------|----------|---------|------------------|
| Control1        | 533.35  | 0.965214 | 6.85346 | 528.9            |
| Control2        | 487.599 | 0.978034 | 7.08779 | 479.8            |
| Control3        | 553.191 | 0.985501 | 7.24638 | 551              |
| Model1          | 443.638 | 0.945964 | 6.25473 | 431.7            |
| Model2          | 547.583 | 0.984731 | 7.26153 | 539.2            |
| Model3          | 472.325 | 0.92114  | 5.67889 | 449.3            |
| NCTP, 200mg/kg1 | 552.886 | 0.983559 | 7.09909 | 526.5            |
| NCTP, 200mg/kg2 | 389.112 | 0.888746 | 5.13834 | 381.9            |
| NCTP, 200mg/kg3 | 597.913 | 0.989211 | 7.5378  | 582.1            |

**Table S10.** The composition of gut microbiota of community bar plot analysis on phylum level

| Group           | Bacteroidetes | Firmicutes | Proteobacteria | Actinobacteria | Other   |
|-----------------|---------------|------------|----------------|----------------|---------|
| Control1        | 0.45051       | 0.40050    | 0.11959        | 0.02472        | 0.00468 |
| Control2        | 0.61329       | 0.26322    | 0.08210        | 0.01521        | 0.02619 |
| Control3        | 0.54347       | 0.36662    | 0.05738        | 0.01370        | 0.01883 |
| Model1          | 0.51545       | 0.21035    | 0.25053        | 0.01801        | 0.00565 |
| Model2          | 0.44250       | 0.22552    | 0.31425        | 0.01033        | 0.00740 |
| Model3          | 0.41627       | 0.11459    | 0.40070        | 0.00679        | 0.06165 |
| NCTP, 200mg/kg1 | 0.23052       | 0.53269    | 0.21080        | 0.01614        | 0.00984 |
| NCTP, 200mg/kg2 | 0.41017       | 0.47890    | 0.07807        | 0.01708        | 0.01578 |
| NCTP, 200mg/kg3 | 0.44510       | 0.42990    | 0.10853        | 0.00842        | 0.00805 |

**Table S11.** Effect of NCTP in the fecal contents levels of short-chain fatty acids

| Group           | Acetic acid | Propionic acid | Butyric acid | Isobutyric acid | Valeric acid | Isovaleric acid |
|-----------------|-------------|----------------|--------------|-----------------|--------------|-----------------|
| Control1        | 780.0279    | 158.0120       | 147.1530     | 13.8854         | 21.5734      | 13.0666         |
| Control2        | 615.1347    | 111.2760       | 117.3162     | 9.7719          | 12.7789      | 7.0137          |
| Control3        | 963.8725    | 245.8098       | 79.1292      | 41.5373         | 30.7864      | 53.4256         |
| Model1          | 125.3740    | 34.4466        | 14.9533      | 4.6361          | 4.1536       | 4.5953          |
| Model2          | 172.6084    | 41.5371        | 19.0487      | 5.3474          | 4.6247       | 6.6614          |
| Model3          | 137.9557    | 39.7339        | 13.8800      | 5.1333          | 4.9555       | 6.4373          |
| NCTP, 200mg/kg1 | 732.9527    | 194.1088       | 79.1453      | 22.1424         | 22.3399      | 28.8777         |
| NCTP, 200mg/kg2 | 575.5987    | 144.6668       | 51.8569      | 20.2049         | 12.5103      | 26.1495         |
| NCTP, 200mg/kg3 | 644.0623    | 161.5644       | 67.8614      | 19.6699         | 15.9855      | 22.9044         |

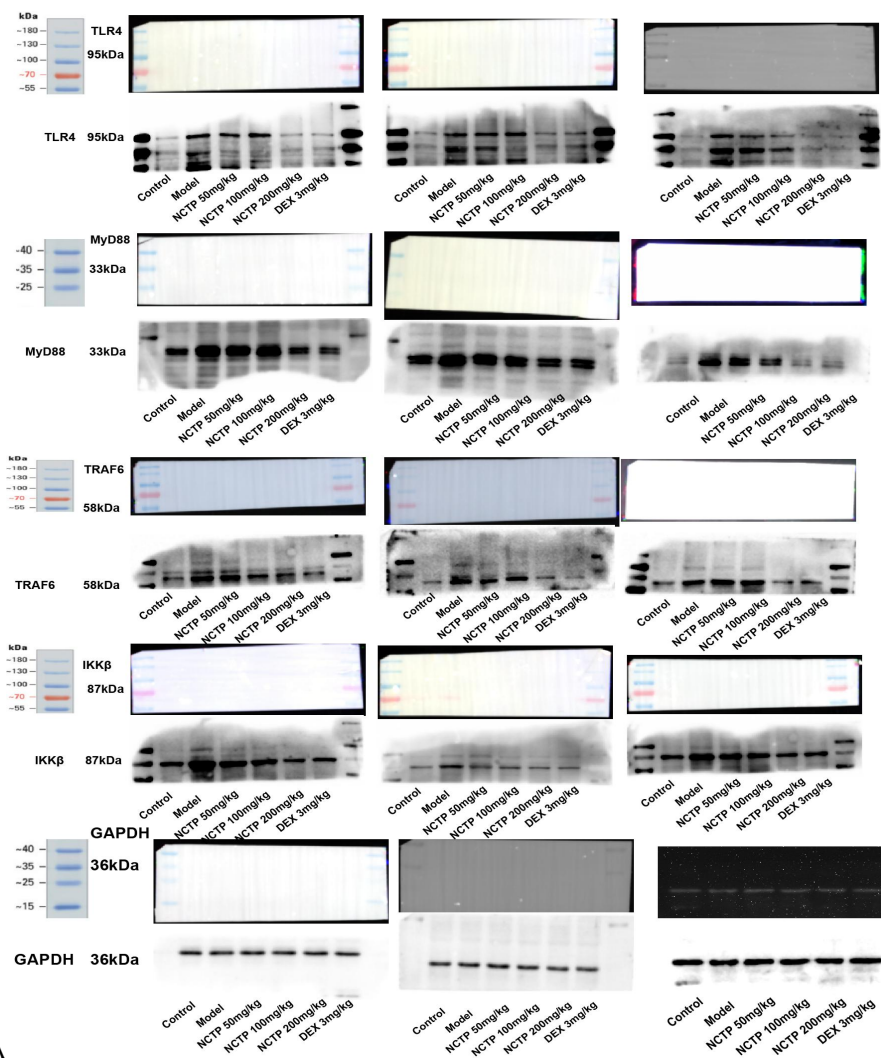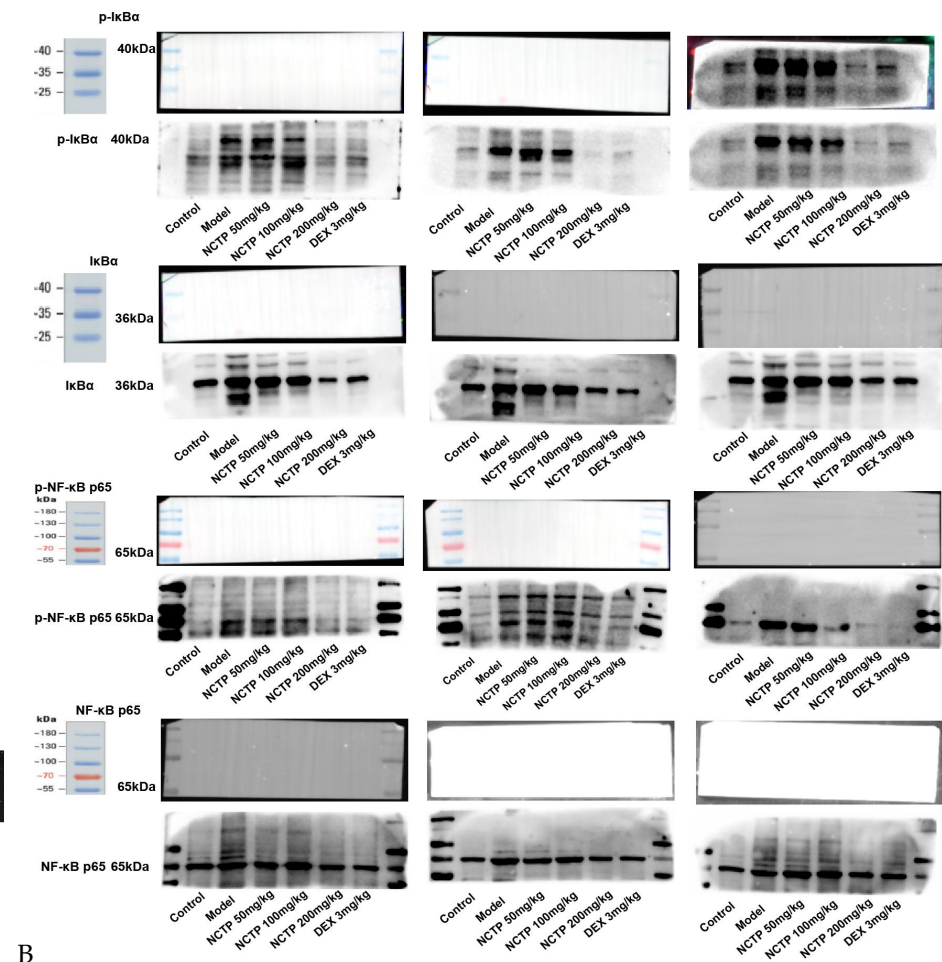

A

B

**Figure S1.** Effects of NCTP on proteins expression of lung tissues.(A) TLR4, MyD88, TRAF6, and IKKβ. (B) The phosphorylation of NF-κB p65 and IκB-α in ALI mice.

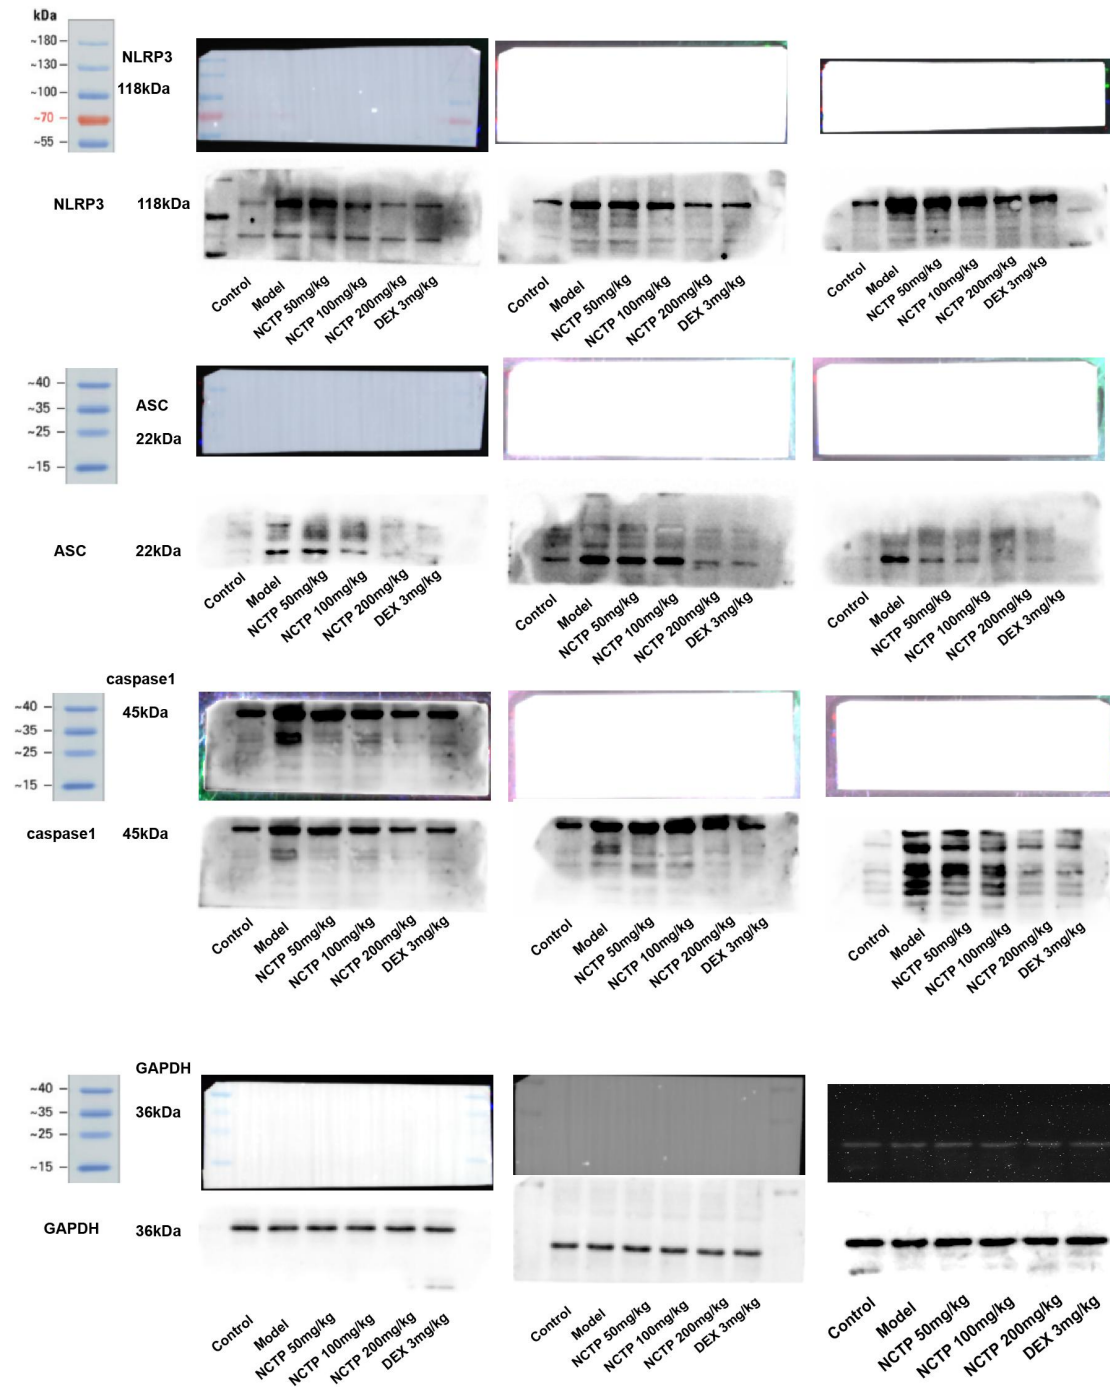

**Figure S2.** Effects of NCTP on proteins expression of NLRP3 in lung tissues of mice

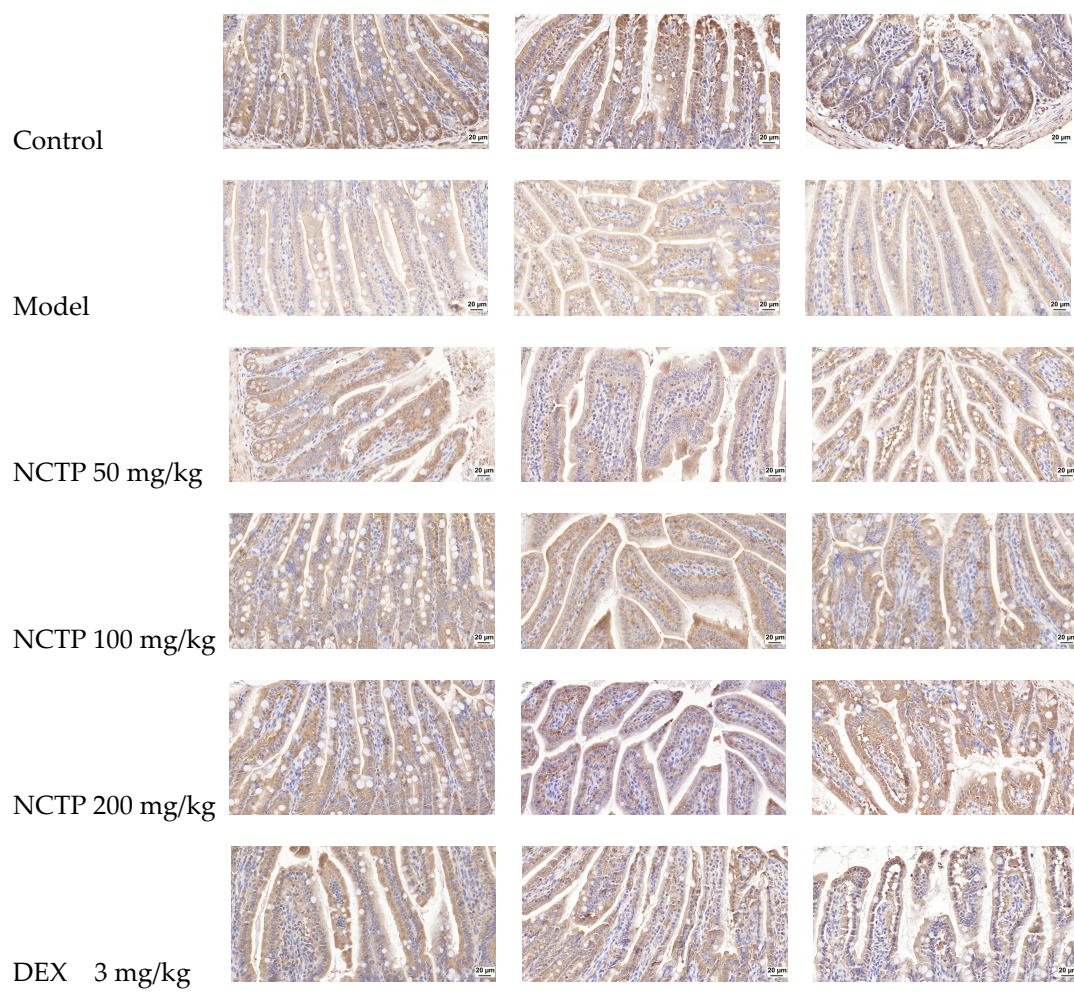

**Figure S3.** Effects of NCTP on ZO-1 protein expression in ALI mice.



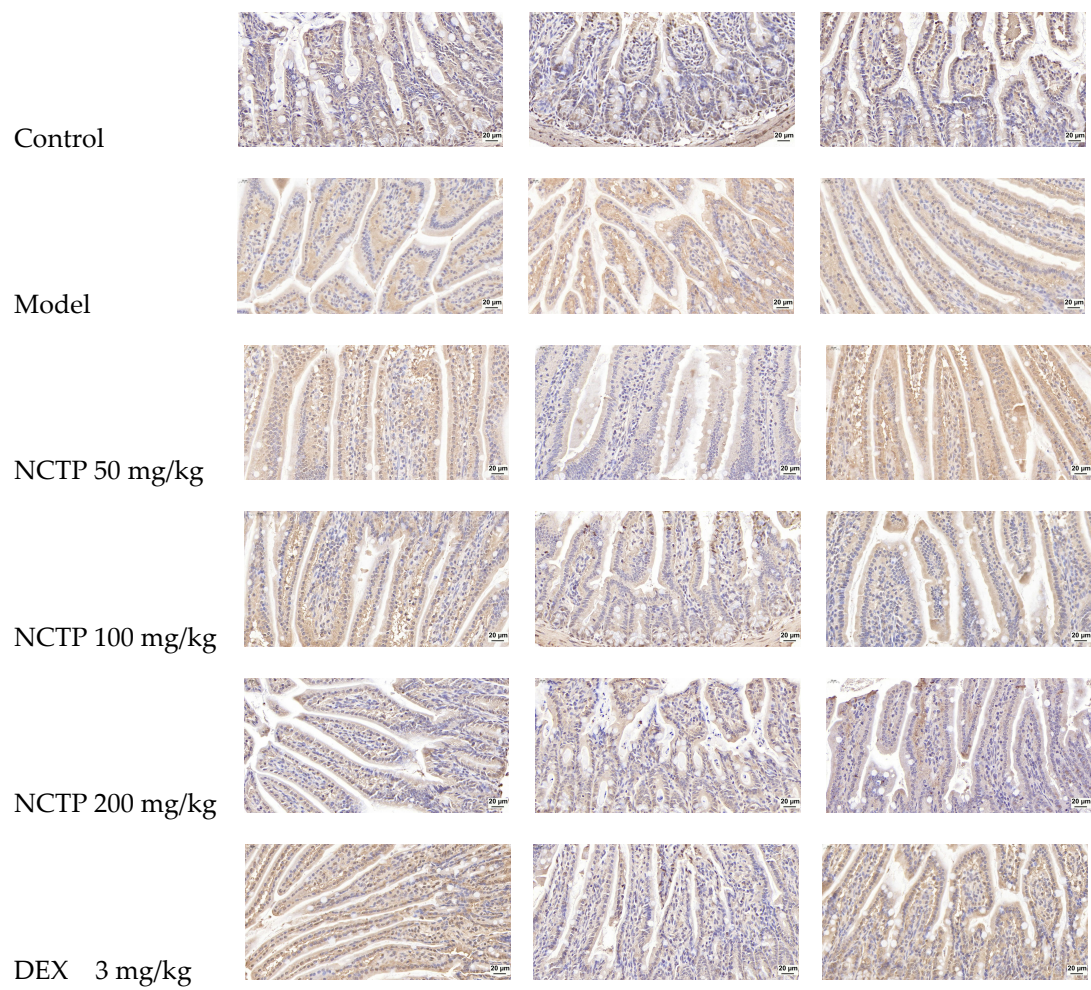

**Figure S4.** Effects of NCTP on occludin protein expression in ALI mice.
